# Supplementary material for: Antiproliferative and Antimicrobial Effects of Rosmarinus officinalis L. Loaded Liposomes
Source: MDPI journal article supplement (doi:10.3390/molecules27133988), 2022-06-21
Supplement: s1 [file s1]

Supplementary Materials

# Antiproliferative and Antimicrobial Effects of *Rosmarinus officinalis* L. Loaded Liposomes

Irina Ielciu <sup>1</sup>, Mihaela Niculae <sup>2</sup>, Eموke Pall <sup>2</sup>, Cristina Barbălată <sup>3,\*</sup>, Ioan Tomuță <sup>3</sup>, Neli-Kinga Olah <sup>4,5</sup>, Ramona Flavia Burtescu <sup>4</sup>, Daniela Benedec <sup>6</sup>, Ilioara Oniga <sup>6</sup> and Daniela Hanganu <sup>6</sup>

<sup>1</sup> Department of Pharmaceutical Botany, Faculty of Pharmacy, “Iuliu Hațieganu” University of Medicine and Pharmacy Cluj-Napoca, 400010, Romania; irina.ielciu@umfcluj.ro (I.I.)

<sup>2</sup> Department of Clinical Sciences, University of Agricultural Sciences and Veterinary Medicine Cluj-Napoca, 400374 Romania; mihaela.niculae@usamvcluj.ro (M.N.); emoke.pall@usamvcluj.ro

<sup>3</sup> Department of Pharmaceutical Technology and Biopharmaceutics, Faculty of Pharmacy, “Iuliu Hațieganu” University of Medicine and Pharmacy, Cluj-Napoca, 400010, Romania; barbalata.cristina@gmail.com (C.B.); tomutaioan@umfcluj.ro (I.T.)

<sup>4</sup> PlantExtrakt Ltd, Rădaia, 407059 Cluj-Napoca, Romania; neli.olah@plantextrakt.ro (N.K.O.); ramona.burtescu@plantextrakt.ro (R.B.)

<sup>5</sup> Department of Medicinal Chemistry and Pharmaceutical Industry, Faculty of Pharmacy, “Vasile Goldiș” Western University of Arad, 310414 Arad, Romania; olah.neli@uvvg.ro (N.O.)

<sup>6</sup> Department of Pharmacognosy, Faculty of Pharmacy, “Iuliu Hațieganu” University of Medicine and Pharmacy, Cluj-Napoca 400010, Romania; dbenedec@umfcluj.ro (D.B.); ioniga@umfcluj.ro (I.O.); dhanganu@umfcluj.ro (D.H.);

\* Correspondence: barbalata.cristina@gmail.com (C.B.), irina.ielciu@umfcluj.ro (I.I.)

## S. Supplementary Materials – Figures S1-S2

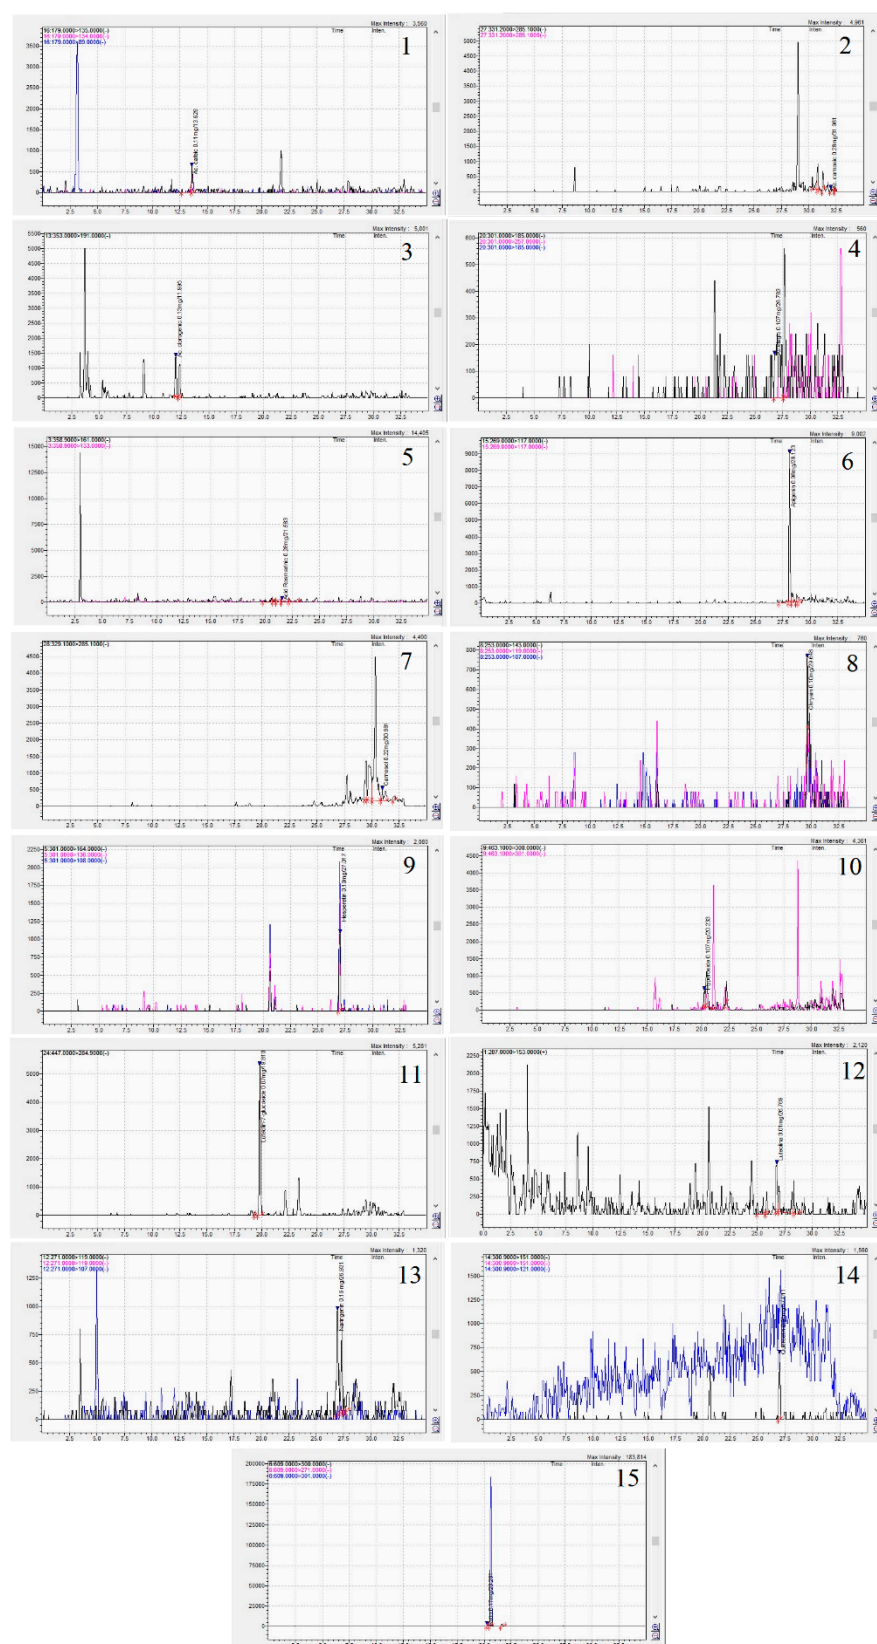

Figure S1. LC-MS chromatogram of *R. officinalis* loaded liposomes.

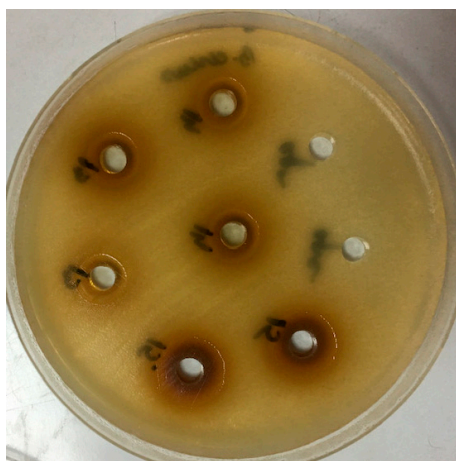

**Figure S2.** Antimicrobial effect of the *R. officinalis* extract loaded liposomes by well diffusion method.
